# Supplementary material for: Supermolecule-assisted synthesis of perovskite nanorods with high PLQY for standard blue emission
Source: Royal Society of Chemistry journal article supplement (doi:10.1039/d2cc06007h), 2022-12-21
Supplement: d2cc06007h1.pdf [file d2cc06007h1.pdf]

## Supplementary Information for:

### Supramolecule-assisted synthesis of perovskite nanorods with high PLQY for standard blue emission

ChuyingYe<sup>a</sup>, Yong Wang<sup>b</sup> and Yin Xiao<sup>\*a</sup>

<sup>a</sup>School of Chemical Engineering and Technology, Tianjin Key Laboratory of Molecular Optoelectronic Sciences, Tianjin University, Tianjin 300350, China

<sup>b</sup>School of Science, Tianjin University, Tianjin 300350, China

E-mail addresses: [xiaoyin@tju.edu.cn](mailto:xiaoyin@tju.edu.cn)

#### Materials

Lead(II) bromide (PbBr<sub>2</sub>, 99%), oleic acid (OAc, 85%), oleylamine (OAM, 80~90%), N,N-dimethylformamide (DMF, anhydrous, 99.8%), octylamine (OA, 99%), octadecene (ODE, 90%), β-cyclodextrin (β-CD, 99%), α-cyclodextrin (α-CD, 99%), and γ-cyclodextrin (γ-CD, 99%) were purchased from Aladdin. Toluene (AR) was purchased from Tianjin Yuanli Chemical Co., LTD. Methyl acetate (MeOAc, 99%, AR) was purchased from Macklin.

#### Synthesis of CsPbBr<sub>3</sub> NC

CsPbBr<sub>3</sub> NC was synthesized by ligand-assisted reprecipitation method as reported before. The precursor solution was formed by mixing oleylamine (OAM), dried oleic acid (OAc), CsBr, PbBr<sub>2</sub> and DMF at room temperature. Then the precursor solution was swiftly injected into toluene. The CsPbBr<sub>3</sub> NC was separated via centrifugation at 4000 rpm for 5 min followed by 12500 rpm for 5 min.

#### Synthesis of CD@CsPbBr<sub>3</sub> NRs

Firstly, the precursor solution was formed by mixing oleylamine (OAM), dried oleic acid (OAc), CsBr, PbBr<sub>2</sub> and DMF at room temperature and stirred until dissolved. Then, proportional CD was added to precursor solution. The clear solution precursor solution was injected to toluene to grow CsPbBr<sub>3</sub> NRs. The crude nanoparticles were separated by centrifugation 12500 rpm for 5min and then CsPbBr<sub>3</sub> NRs was injected into toluene and centrifuge at 4000 rpm for 5 min in the follow purification process.

#### Instruments

The UV-vis absorption spectra were recorded on a MAPADA UV-1800PC spectrophotometer. The PL spectra and PLQYs were recorded by a Horiba Fluorolog system (Horiba-F4600) with a Xe lamp as the excitation source and a Quanta-Phi integrating sphere. The X-Ray diffraction spectra were measured with the XRD Bruker D8-focus with Cu Kα ( $\lambda = 1.5406 \text{ \AA}$ ) radiation source. The transmission electron microscopy images of the NCs and NRs were recorded on a TEM (JEM-200F) at 200 kV. The samples for measurements were suspended on carbon-coated Cu grids. The XPS spectra and elemental composition was detected by a PHI 5000 Versa Probe X-ray photoelectron spectroscope (ULVAC-PHI, America).

---

## Table of Contents

**Table S1 • The summary of PLQY, average lifetime ( $\tau_{ave}$ ), radiative recombination lifetime ( $\tau_r$ ), nonradiative recombination lifetime ( $\tau_{nr}$ ), radiative ( $k_r$ ) and nonradiative ( $k_{nr}$ ) decay rates of the CsPbBr<sub>3</sub> NC and NRs.**

**Table S2 • The element contents of CsPbBr<sub>3</sub> NC and  $\beta$ -CD@CsPbBr<sub>3</sub> NR with 1:4 mole ratio of  $\beta$ -CD and PbBr<sub>2</sub> according to XPS.**

**Table S3 • The summarized diameter and length of NRs.**

**Figure S1 • TEM image, UV-vis absorption and PL spectra of CsPbBr<sub>3</sub> NC.**

**Figure S2 • XPS spectra with elements Cs 3d, C 1s and Br 3d of CsPbBr<sub>3</sub> NC and  $\beta$ -CD@CsPbBr<sub>3</sub> NR.**

**Figure S3 • TEM of CsPbBr<sub>3</sub> NCs and NRs with various CD and CD:Pb<sup>2+</sup> ratio.**

**Figure S4 • Time dependence of PL of colloidal nanostructures in toluene at ambient atmosphere of CsPbBr<sub>3</sub> NC,  $\alpha$ -CD@CsPbBr<sub>3</sub> NR and  $\gamma$ -CD@CsPbBr<sub>3</sub> NR.**

**Table S1.** The summary of PLQY, average lifetime ( $\tau_{ave}$ ), radiative ( $\tau_r$ ) and nonradiative ( $\tau_{nr}$ ) recombination lifetime, radiative ( $k_r$ ) and nonradiative ( $k_{nr}$ ) decay rates, slow ( $\tau_1$ ) and fast ( $\tau_2$ ) decay lifetime and their weighting factors ( $f_1$  and  $f_2$ ) of the CsPbBr<sub>3</sub> NC and CsPbBr<sub>3</sub> NRs with different kinds of CD and various CD:Pb<sup>2+</sup> ratios in the precursor solution.

|                                     | $f_1$ | $f_2$ | $\tau_1$ (ns) | $\tau_2$ (ns) | $\tau_r$ (ns) | $\tau_{nr}$ (ns) | $\tau_{avg}$ | QY(%) | $k_r$ | $k_{nr}$ |
|-------------------------------------|-------|-------|---------------|---------------|---------------|------------------|--------------|-------|-------|----------|
| CsPbBr <sub>3</sub>                 | 0.13  | 0.87  | 24.7          | 2.8           | 9.4           | 14.4             | 5.7          | 60.5  | 0.106 | 0.069    |
| $\beta$ -CD:PbBr <sub>2</sub> =1:5  | 0.06  | 0.94  | 13.2          | 3.3           | 5.2           | 15.7             | 3.9          | 75.2  | 0.192 | 0.063    |
| $\beta$ -CD:PbBr <sub>2</sub> =1:4  | 0.05  | 0.95  | 12.3          | 3.8           | 4.7           | 42.4             | 4.2          | 90.1  | 0.213 | 0.024    |
| $\beta$ -CD:PbBr <sub>2</sub> =1:3  | 0.06  | 0.94  | 10.8          | 3.4           | 6.5           | 9.2              | 3.8          | 58.8  | 0.154 | 0.109    |
| $\alpha$ -CD:PbBr <sub>2</sub> =1:5 | 0.05  | 0.95  | 13.7          | 3.5           | 9.5           | 6.6              | 3.9          | 40.9  | 0.105 | 0.152    |
| $\alpha$ -CD:PbBr <sub>2</sub> =1:4 | 0.05  | 0.95  | 12.9          | 3.4           | 9.4           | 7.0              | 3.9          | 42.5  | 0.106 | 0.143    |
| $\alpha$ -CD:PbBr <sub>2</sub> =1:3 | 0.04  | 0.96  | 14.8          | 3.8           | 10.4          | 7.0              | 4.2          | 40.3  | 0.096 | 0.143    |
| $\gamma$ -CD:PbBr <sub>2</sub> =1:5 | 0.03  | 0.97  | 9.7           | 3.2           | 4.3           | 23.2             | 3.6          | 84.5  | 0.233 | 0.043    |
| $\gamma$ -CD:PbBr <sub>2</sub> =1:4 | 0.04  | 0.96  | 14.3          | 3.3           | 4.3           | 27.8             | 3.7          | 86.7  | 0.233 | 0.034    |
| $\gamma$ -CD:PbBr <sub>2</sub> =1:3 | 0.05  | 0.95  | 14.7          | 3.0           | 4.8           | 14.1             | 3.6          | 74.5  | 0.208 | 0.071    |

The decay transients can be fitted using a biexponential decay function<sup>1, 2</sup> given by Eq.

(1):

$$I(t) = A_1 \exp(-t/\tau_1) + A_2 \exp(-t/\tau_2) \quad (1)$$

The average lifetimes ( $\tau_{avg}$ ) is calculated according to Eq. (2), where  $\tau_i$  and  $f_i$  are the lifetime and lifetime weighted fractional intensity of each component of the multi exponential fit:

$$\tau_{avg} = \sum f_i \times \tau_i \quad (2)$$

The radiative recombination lifetime ( $\tau_r$ ), nonradiative recombination lifetime ( $\tau_{nr}$ ), radiative decay rate ( $k_r$ ) and nonradiative decay rate ( $k_{nr}$ ) are given by Eq. (3):

$$QY = k_r / (k_r + k_{nr}) = 1/\tau_r / (1/\tau_r + 1/\tau_{nr}) = \tau_{nr} / (\tau_{nr} + \tau_r) \quad (3)$$

**Table S2.** The XPS measured element contents of CsPbBr<sub>3</sub> NC and  $\beta$ -CD@CsPbBr<sub>3</sub> NR with 1:4 mole ratio of  $\beta$ -CD and PbBr<sub>2</sub>. The error is the standard deviations of the mean of three batches.

| Element                  | C1s        | N1s       | O1s        | Br3d      | Cs3d5     | Pb4f7     |
|--------------------------|------------|-----------|------------|-----------|-----------|-----------|
| CsPbBr <sub>3</sub>      | 33.85±3.35 | 1.47±0.32 | 63.66±5.08 | 0.51±0.20 | 0.24±0.18 | 0.27±0.16 |
| β-CD@CsPbBr <sub>3</sub> | 24.20±4.11 | 0.37±0.25 | 74.11±6.27 | 0.52±0.29 | 0.31±0.15 | 0.40±0.20 |

**Table S3.** The summarized diameter and length of NRs. The error is the standard deviations of the mean of 100 NRs.

| NRs                         | Length (nm) | Diameter (nm) |
|-----------------------------|-------------|---------------|
| β-CD:PbBr <sub>2</sub> =1:5 | 17.8±1.5    | 3.5±0.2       |
| β-CD:PbBr <sub>2</sub> =1:4 | 18.3±1.7    | 3.6±0.1       |
| β-CD:PbBr <sub>2</sub> =1:3 | 20.1±1.1    | 3.6±0.1       |
| α-CD:PbBr <sub>2</sub> =1:4 | 22.1±1.6    | 3.5±0.1       |
| γ-CD:PbBr <sub>2</sub> =1:4 | 17.8±2.0    | 3.6±0.2       |

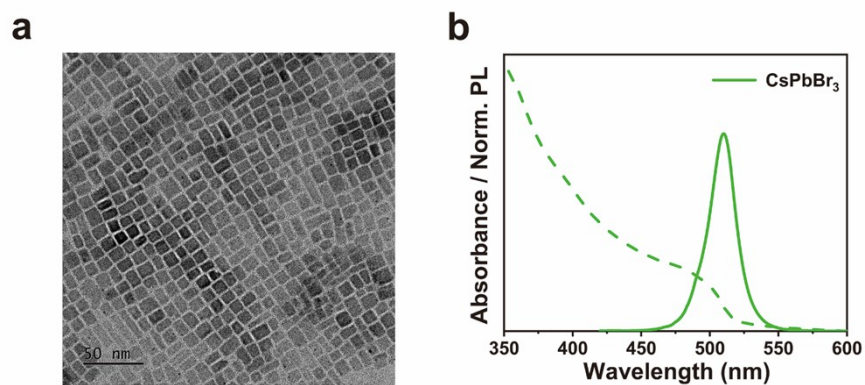

**Figure S1.** (a) TEM image and (b) UV-vis absorption and PL spectra of CsPbBr<sub>3</sub> NC.

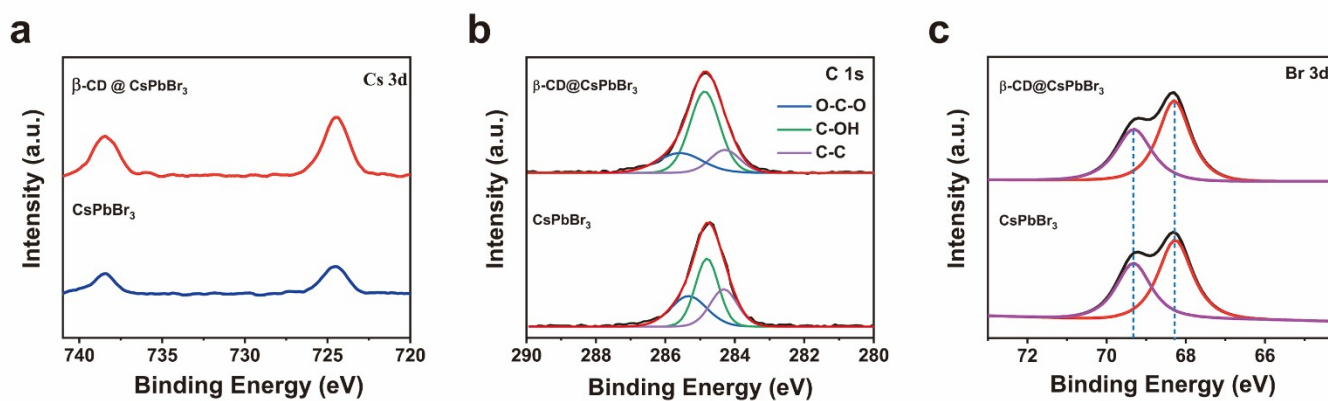

**Figure S2.** XPS spectra with elements (a) Cs 3d, (b) C 1s and (c) Br 3d of CsPbBr<sub>3</sub> NC and  $\beta$ -CD@CsPbBr<sub>3</sub> NR with 1:4 mole ratio of  $\beta$ -CD and PbBr<sub>2</sub>.

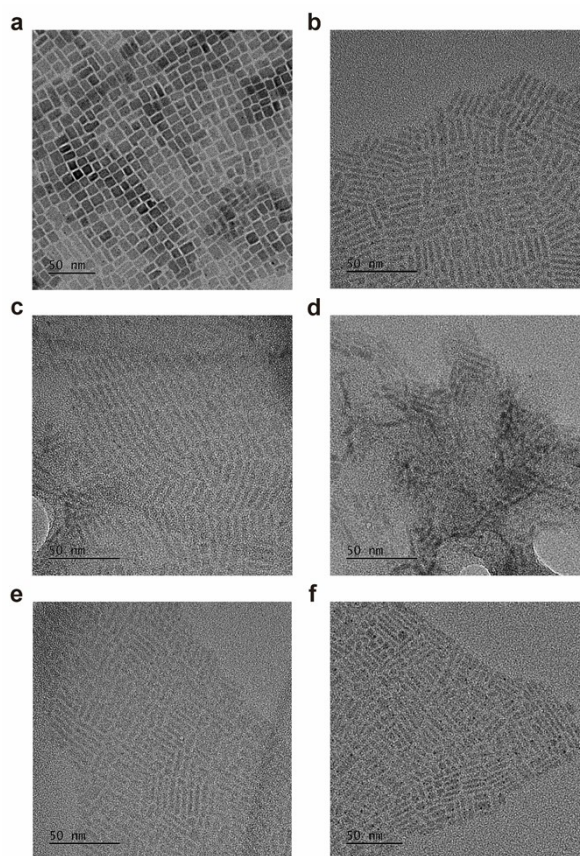

**Figure S3.** TEM of (a) CsPbBr<sub>3</sub> NC, (b)  $\beta$ -CD@CsPbBr<sub>3</sub> NR with 1:4 ratio of  $\beta$ -CD:Pb<sup>2+</sup>, (c)  $\beta$ -CD@CsPbBr<sub>3</sub> NR with 1:5 ratio of  $\beta$ -CD:Pb<sup>2+</sup>, (d)  $\beta$ -CD@CsPbBr<sub>3</sub> NR with 1:3 ratio of  $\beta$ -CD:Pb<sup>2+</sup>, (e)  $\alpha$ -CD@CsPbBr<sub>3</sub> NR with 1:4 ratio of  $\alpha$ -CD:Pb<sup>2+</sup> and (f)  $\gamma$ -CD@CsPbBr<sub>3</sub> NR with 1:4 ratio of  $\gamma$ -CD:Pb<sup>2+</sup>.

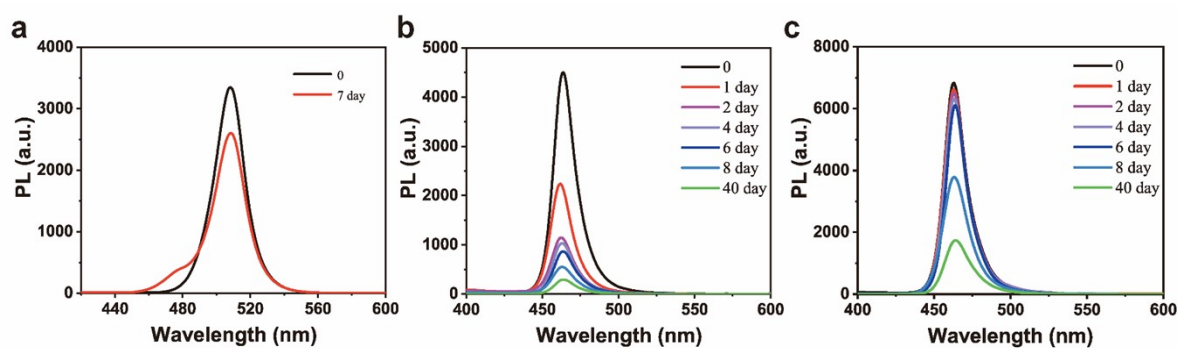

**Figure S4.** Time dependence of PL of colloidal nanostructures in toluene at ambient atmosphere (relative humidity; 30-40%). (a) CsPbBr<sub>3</sub> NC, (b)  $\alpha$ -CD@CsPbBr<sub>3</sub> NR with 1:4 ratio of  $\alpha$ -CD and PbBr<sub>2</sub> and (c)  $\gamma$ -CD@CsPbBr<sub>3</sub> NR with 1:4 ratio of  $\gamma$ -CD and PbBr<sub>2</sub>.

---

## Reference

1. C. Sun, Z. Gao, H. Liu, L. Wang, Y. Deng, P. Li, H. Li, Z.-H. Zhang, C. Fan and W. Bi, *Chemistry of Materials*, 2019, **31**, 5116-5123.
2. S. Zhang, H. Liu, X. Li and S. Wang, *Nano Energy*, 2020, **77**, 105302.
